# Supplementary material
Source: Springer Nature journal article supplement (https://www.springermedizin.de/resource/supplementary/13058_2013_3598_MOESM12_ESM.pdf/9703924)
Supplement: MOESM12 [file 9703924]

Table 1

**Univariate analysis of clinical and pathologic characteristics of 99 PR+ breast cancer patients in relation to p-c-Jun and PR colocalization positivity using Odds ratio model**

| p-c-Jun and PR colocalization |                                                |             |             |                   |                                 |                    |
|-------------------------------|------------------------------------------------|-------------|-------------|-------------------|---------------------------------|--------------------|
| Variable                      | Characteristics                                | (-)<br>N=18 | (+)<br>N=81 | OR<br>(ODD RATIO) | 95% CI<br>(Confidence Interval) | p Value            |
| Clinicopathological data      |                                                |             |             |                   |                                 |                    |
| Age (Y)                       | < 50                                           | 6           | 33          | 0.73              | 0.2-2.3                         | 0.56 <sup>a</sup>  |
|                               | ≥ 50                                           | 12          | 48          |                   |                                 |                    |
| Tumor size                    | ≤ 20 mm                                        | 1           | 15          | 0.25              | 0.005-1.94                      | 0.29 <sup>b</sup>  |
|                               | > 20 mm                                        | 17          | 66          |                   |                                 |                    |
| Lymph node metastasis         | negative                                       | 3           | 38          | 0.22              | 0.04-0.9                        | 0.019 <sup>b</sup> |
|                               | positive                                       | 15          | 43          |                   |                                 |                    |
| Distant metastasis            | M0                                             | 17          | 76          | 1.1               | 0.1-56                          | 1 <sup>b</sup>     |
|                               | M1                                             | 1           | 5           |                   |                                 |                    |
| Clinical stage                | I + II                                         | 11          | 50          | 0.97              | 0.3-3.3                         | 0.96 <sup>a</sup>  |
|                               | III + IV                                       | 7           | 31          |                   |                                 |                    |
| Tumor grade                   | Well to moderately differentiated <sup>c</sup> | 13          | 68          | 0.49              | 0.13-2.1                        | 0.3 <sup>b</sup>   |
|                               | Poorly differentiated                          | 5           | 13          |                   |                                 |                    |
| Estrogen receptor (ER)        | Negative                                       | 1           | 6           | 0.74              | 0.01-6.7                        | 1 <sup>b</sup>     |
|                               | Positive                                       | 17          | 75          |                   |                                 |                    |

a  $\chi^2$  Test.

b Fisher's exact test .

c Well to moderately differentiated: tumor grade 1+2, poorly differentiated: tumor grade 3
